# Supplementary material for: Impacts of climate change on infestations of Dubas bug (Ommatissus lybicus Bergevin) on date palms in Oman
Source: PeerJ. 2018 Sep 5;6:e5545. doi: 10.7717/peerj.5545 (PMC6129147; doi:10.7717/peerj.5545)
Supplement: Supplemental Information 2 [file peerj-06-5545-s002.csv]

longitude	latitude
58.09950278	23.4584
58.09707222	23.44265833
58.09249167	23.410675
58.15579444	23.37815
58.08234167	23.20990278
58.07983889	23.22771667
58.12260833	23.33243056
58.14196111	23.21685
58.10611944	23.36254444
58.10416667	23.25083333
57.85278056	23.14803611
57.84834444	23.14104722
57.86743611	23.17971944
57.85883889	23.16310556
58.03876667	23.35701111
58.03221667	23.35553889
58.01946389	23.35264722
57.90785278	23.17778889
57.92573889	23.16628056
58.03972778	23.28289444
57.91666667	22.96777778
57.77188611	22.94423333
57.76618333	22.94369444
57.80594167	22.78574444
57.78072222	22.94016389
57.95984444	22.85508333
57.765	22.92805556
57.77891111	23.00333056
57.53346389	23.02105556
57.45892222	23.05312222
57.15193333	23.172575
57.32326667	23.08478056
57.12918889	23.06801111
57.12793889	23.05082222
57.13345833	23.04158611
57.14332222	22.98913611
57.33526944	22.64560556
57.13796389	22.98263333
57.12460556	22.97476111
57.52246111	22.38359444
57.527475	22.37312778
58.46244444	23.123
58.454125	23.10297222
58.47572222	23.11585556
58.42316111	23.14139167
58.53069167	23.11745278
58.82824444	22.94593056
58.56085278	23.10668056
58.57004722	23.09793889
58.57484722	23.10016389
58.58065833	23.10415278
58.5671	23.08140833
58.61441389	23.06953056
58.61636667	23.05285833
58.64231944	23.04795
58.68729444	23.04288611
58.70193333	23.03461944
58.78926111	22.99106389
58.82605833	22.93490556
58.98623333	22.83223056
58.54475278	23.04065556
58.55625556	22.96832222
58.514575	23.04586667
58.55555556	22.97416667
58.55279722	22.97775
58.54692222	22.982375
58.53666667	22.98083333
58.52457778	22.97980833
58.496275	22.98883611
58.28924722	22.96450833
58.45055556	22.97638889
58.31328611	23.11665
58.34734167	23.09573333
58.39268889	23.13154167
58.35408611	23.1879
58.15256667	22.809275
58.1541	22.8241
58.217525	22.87960278
58.29641667	22.97113889
58.29353056	22.98608611
58.05631667	22.86178889
58.04848333	22.91143333
58.056975	22.92372222
58.12993889	22.7965
58.16948333	22.84385
58.74457222	22.49664444
58.85444444	22.38833333
58.82699722	22.59268333
58.79865556	22.42858889
58.795	22.44972222
58.81701111	22.44255556
58.78083333	22.43555556
58.505675	22.76045278
58.42900278	22.89194444
58.42286667	22.89778333
59.09165	22.61089167
59.08010278	22.60348611
59.1196	22.54846389
59.10833333	22.56
59.10931944	22.56683056
59.09200556	22.59254722
59.16206944	22.13963056
58.64984444	22.74053889
59.26630556	22.08401389
59.26630556	22.08401389
59.33377778	22.00896111
59.262525	22.09471389
59.27277778	22.07138889
59.12375833	22.50816667
58.68936944	22.73724167
22.864525	58.76368056
59.27138889	22.64638889
59.26727778	22.599975
59.33619722	22.51368333
59.32551667	22.55055278
22.67694444	59.30666667
59.21994722	22.65673333
59.25172222	22.64521111
59.26080278	22.64707222
59.53094722	22.56661111
59.295875	22.617775
59.32736944	22.54936944
56.38694444	24.07305556
56.42670556	24.08466389
56.41712778	24.10200556
56.4325	24.09138889
56.42930833	24.09539167
56.44871667	24.09291944
56.431275	24.09223056
56.45701944	24.08081389
56.45318056	24.09345556
56.39997222	23.931425
56.41972222	23.93416667
56.49111111	23.98527778
56.48444444	23.99
56.5125	24.00472222
56.55638333	23.85153611
57.33038889	23.52408333
57.33869444	23.54545833
57.33611111	23.56083333
57.32444444	23.43388889
57.32305556	23.43694444
57.32083889	23.4411
57.32187222	23.44556111
57.32555556	23.44694444
57.32027778	23.44944444
57.31934722	23.44435
57.31340833	23.45789167
57.31138889	23.460275
57.31166667	23.46305556
57.31527778	23.45472222
57.31305556	23.46055556
57.30472222	23.46805556
57.30722222	23.46638889
57.27462778	23.46606667
57.30027778	23.47361111
57.29055278	23.48194444
57.30666667	23.48611111
57.29826111	23.42666111
57.04618889	23.43927778
57.03715278	23.45800833
57.11423056	23.44905833
57.12006944	23.44224444
57.12476944	23.42465
57.11780556	23.4128
57.13139722	23.42081944
57.13944444	23.42194444
57.15093889	23.42208611
57.16101389	23.42868333
57.17145833	23.40865556
57.17736389	23.40341944
57.18777778	23.37738611
57.21236944	23.38378611
57.21695278	23.39033889
57.21610833	23.39380278
57.22111111	23.38555556
57.24513056	23.3991
57.30970556	23.38576111
23.31082778	23.31082778
57.4649	23.284075
57.40716667	23.21696111
57.45275	23.27329444
57.51066111	23.20648056
57.55539167	23.216075
57.55928333	23.19062778
57.56147222	23.19022222
57.491625	23.18441667
57.57305556	23.18805556
57.61838056	23.18669444
57.65511667	23.17793056
57.67083333	23.17111111
57.53195833	23.31056667
57.55052222	23.30337778
57.54388889	23.30055556
57.54861111	23.30277778
57.58288333	23.31816667
57.66037778	23.38425278
57.63565	23.35563333
56.11275278	24.6538
56.18215833	24.72147778
56.37753889	23.85921111
56.12241667	24.31561111
56.12652778	24.31180278
56.06926111	24.48536944
55.97154444	24.49725278
56.23414167	24.20385556
56.26337222	24.19533611
56.23865556	24.20681667
56.31057222	24.38508889
56.81970833	23.08155556
56.908075	23.16883056
56.19025556	23.87432778
57.01176944	23.21541389
57.04465	23.25315556
57.06331944	23.22910833
57.03685	23.22398611
56.37933056	23.86248889
57.07311389	23.10796389
57.08772222	23.13252778
56.92038611	23.38520278
56.91624722	23.39525
56.98761111	23.39755556
57.01064444	23.21587222
56.78085278	23.54882222
56.86289444	23.38593056
56.88778056	23.40222778
56.86865833	23.40985556
56.83816667	23.42118333
56.80677222	23.63610556
56.7544	23.68901667
56.677725	23.53965278
56.64235	23.58103611
56.50791389	23.69646389
56.54996944	23.68906944
56.37012222	23.66633889
56.37483611	23.86096389
56.47213333	23.50561667
56.35385556	23.54901389
58.91980556	23.17178611
58.83160556	23.24252778
58.81495833	23.17373889
58.57049444	23.23148056
58.68595833	23.20083056
58.55012222	23.24858889
58.52049444	23.24725556
58.85898333	23.08994722
58.58559167	23.46053611
58.52314722	23.40181111
58.59561111	23.26710833
58.66629722	23.517875
58.6598	23.52323056
58.71938889	23.51463611
58.98048889	23.04457778
58.98063333	23.04470556
58.98898611	23.03236111
58.69580278	23.22048889
58.91077778	23.06025278
58.85486389	23.0872
58.58599722	23.03135833
58.91417778	23.27240278
58.91304444	23.265625
58.87308611	23.07151944
58.91086111	23.22325833
58.58599722	23.03135833
58.827325	23.14465556
58.40736944	23.54530556
58.41196667	23.55389444
58.40387778	23.55218056
23.53698056	23.53698056
23.53698056	23.53698056
58.38100833	23.53026389
58.82824444	22.94593056
